# Supplementary material for: NLR Genes Related Transcript Sets in Potato Cultivars Bearing Genetic Material of Wild Mexican Solanum Species
Source: MDPI journal article supplement (doi:10.3390/agronomy11122426), 2021-11-28
Supplement: s1 [file s1]

## Supplementary material for Kochetov et al.

Table S1. Marker NLR genes associated with wide-range resistance against *P. infestans*.

| Gene            | NCBI accession number | Organism                | Length, nt | ORF number | NCBI amino acid sequence accession |
|-----------------|-----------------------|-------------------------|------------|------------|------------------------------------|
| <i>Rpi-blb1</i> | AY426259.1            | <i>S. bulbocastanum</i> | 7349       | 1          | AAR29069.1                         |
| <i>R3a</i>      | AY849382.1            | <i>S. tuberosum</i>     | 3849       | 1          | AAW48299.1                         |
| <i>Rpi-sto1</i> | EU884421.1            | <i>S. stoloniferum</i>  | 3592       | 1          | ACI25288.1                         |
| <i>R3b</i>      | JF900492.1            | <i>S. demissum</i>      | 105207     | 6          | AEC47890.1                         |
| <i>R8</i>       | KU530153              | <i>S. demissum</i>      | 174573     | 27         | ANJ02805.1                         |

Table S2. RNA-seq libraries statistics for raw data and after filtering by quality.

|                              |     |           | Raw data              |                       |                        |       | Filtered data         |                       |                        |       |
|------------------------------|-----|-----------|-----------------------|-----------------------|------------------------|-------|-----------------------|-----------------------|------------------------|-------|
| Cultivar                     | HPI | replicate | size,<br>mln<br>reads | size,<br>bln<br>bases | mean<br>read<br>length | Q30,% | size,<br>mln<br>reads | size,<br>bln<br>bases | mean<br>read<br>length | Q30,% |
| Siverskij                    | 0   | 1         | 70.75                 | 10.50                 | 148                    | 90.96 | 64.44                 | 9.59                  | 148                    | 93.61 |
| Siverskij                    | 0   | 2         | 58.85                 | 8.73                  | 148                    | 91.24 | 53.74                 | 7.99                  | 148                    | 93.82 |
| Siverskij                    | 0   | 3         | 60.51                 | 8.97                  | 148                    | 91.16 | 55.20                 | 8.21                  | 148                    | 93.75 |
| Siverskij                    | 24  | 1         | 57.01                 | 8.45                  | 148                    | 90.95 | 50.79                 | 7.55                  | 148                    | 94.18 |
| Siverskij                    | 24  | 2         | 72.39                 | 10.51                 | 145                    | 90.92 | 63.28                 | 9.26                  | 146                    | 94.37 |
| Siverskij                    | 24  | 3         | 62.04                 | 9.21                  | 148                    | 89.96 | 53.24                 | 7.92                  | 148                    | 94.40 |
| Bintje                       | 0   | 1         | 69.75                 | 10.37                 | 148                    | 90.34 | 62.77                 | 9.35                  | 148                    | 93.36 |
| Bintje                       | 0   | 2         | 70.53                 | 10.44                 | 148                    | 91.05 | 64.15                 | 9.53                  | 148                    | 93.69 |
| Bintje                       | 0   | 3         | 72.97                 | 10.82                 | 148                    | 91.05 | 66.39                 | 9.88                  | 148                    | 93.69 |
| Bintje                       | 24  | 1         | 77.96                 | 11.38                 | 146                    | 91.90 | 70.05                 | 10.29                 | 146                    | 94.67 |
| Bintje                       | 24  | 2         | 57.36                 | 8.49                  | 148                    | 91.86 | 52.05                 | 7.73                  | 148                    | 94.52 |
| Bintje                       | 24  | 3         | 70.86                 | 10.36                 | 146                    | 91.31 | 63.18                 | 9.28                  | 146                    | 94.34 |
| Evraziya                     | 0   | 1         | 73.93                 | 10.97                 | 148                    | 90.76 | 66.82                 | 9.94                  | 148                    | 93.58 |
| Evraziya                     | 0   | 2         | 62.23                 | 9.24                  | 148                    | 90.76 | 56.36                 | 8.39                  | 148                    | 93.61 |
| Evraziya                     | 0   | 3         | 79.70                 | 11.83                 | 148                    | 90.87 | 72.36                 | 10.76                 | 148                    | 93.63 |
| Evraziya                     | 24  | 1         | 69.99                 | 10.33                 | 147                    | 91.90 | 63.14                 | 9.35                  | 148                    | 94.78 |
| Evraziya                     | 24  | 2         | 69.07                 | 10.18                 | 147                    | 89.98 | 60.12                 | 8.89                  | 147                    | 93.87 |
| Evraziya                     | 24  | 3         | 65.74                 | 9.70                  | 147                    | 91.73 | 59.06                 | 8.74                  | 147                    | 94.71 |
| S. stoloniferum,<br>30514/15 | 0   | 1         | 55.15                 | 8.22                  | 149                    | 90.95 | 49.81                 | 7.44                  | 149                    | 93.84 |
| S. stoloniferum,<br>30514/16 | 0   | 2         | 65.56                 | 9.77                  | 148                    | 91.20 | 59.52                 | 8.88                  | 149                    | 93.95 |
| S. stoloniferum,<br>30514/17 | 0   | 3         | 58.15                 | 8.67                  | 149                    | 89.93 | 51.36                 | 7.66                  | 149                    | 93.48 |
| S. stoloniferum,<br>30514/18 | 24  | 1         | 59.97                 | 8.91                  | 148                    | 90.47 | 52.57                 | 7.83                  | 148                    | 94.15 |
| S. stoloniferum,<br>30514/19 | 24  | 2         | 61.10                 | 9.08                  | 148                    | 91.34 | 54.39                 | 8.10                  | 148                    | 94.60 |
| S. stoloniferum,<br>30514/20 | 24  | 3         | 55.88                 | 8.29                  | 148                    | 91.04 | 49.54                 | 7.37                  | 148                    | 94.39 |
| Sudarynya                    | 0   | 1         | 77.88                 | 11.55                 | 148                    | 90.96 | 70.83                 | 10.53                 | 148                    | 93.63 |
| Sudarynya                    | 0   | 2         | 82.32                 | 12.19                 | 148                    | 90.99 | 74.45                 | 11.06                 | 148                    | 93.77 |
| Sudarynya                    | 0   | 3         | 71.99                 | 10.65                 | 147                    | 91.01 | 65.13                 | 9.67                  | 148                    | 93.83 |
| Sudarynya                    | 24  | 1         | 75.01                 | 10.93                 | 145                    | 91.91 | 66.85                 | 9.80                  | 146                    | 94.86 |
| Sudarynya                    | 24  | 2         | 65.64                 | 9.67                  | 147                    | 91.49 | 58.70                 | 8.68                  | 147                    | 94.54 |
| Sudarynya                    | 24  | 3         | 69.16                 | 10.16                 | 146                    | 92.12 | 62.29                 | 9.19                  | 147                    | 94.89 |

Table S3. *De novo* assembled transcriptomes metrics.

| Cultivar                         | Number of contigs | N50  | Median lengths | Number of ORFs | Number of contaminants | Number of transcripts with TPM > 1 |
|----------------------------------|-------------------|------|----------------|----------------|------------------------|------------------------------------|
| Evraziya                         | 76488             | 2404 | 1719           | 80646          | 44                     | 59175                              |
| Siverskij                        | 75678             | 2444 | 1740           | 79983          | 34                     | 57669                              |
| Sudarynya                        | 62179             | 2430 | 1742           | 66694          | 39                     | 53337                              |
| Bintje                           | 70495             | 2395 | 1713           | 74422          | 103                    | 54658                              |
| <i>S.stoloniferum</i> , 30514/15 | 110556            | 2337 | 1691           | 115844         | 31                     | 82395                              |

Table S4. BUSCO scores for *de novo* transcriptomes.

| Cultivar                         | <i>Embryophyta</i> universal orthologues |              |            |          |            |
|----------------------------------|------------------------------------------|--------------|------------|----------|------------|
|                                  | Present, %                               |              |            |          | missing, % |
|                                  | Single-copied                            | Multi-copied | Fragmented | In total |            |
| Evraziya                         | 26                                       | 61           | 7,2        | 94,2     | 5,8        |
| Siverskij                        | 26,7                                     | 60,7         | 7,1        | 94,5     | 5,5        |
| Sudarynya                        | 33,7                                     | 51,1         | 8,7        | 93,5     | 6,5        |
| Bintje                           | 28,2                                     | 58           | 6,9        | 93,1     | 6,9        |
| <i>S.stoloniferum</i> , 30514/15 | 14,3                                     | 78,6         | 4,4        | 97,3     | 2,7        |
