# Supplementary figures and images for: NLR Genes Related Transcript Sets in Potato Cultivars Bearing Genetic Material of Wild Mexican Solanum Species
Source: MDPI journal article supplement (doi:10.3390/agronomy11122426), 2021-11-28

---

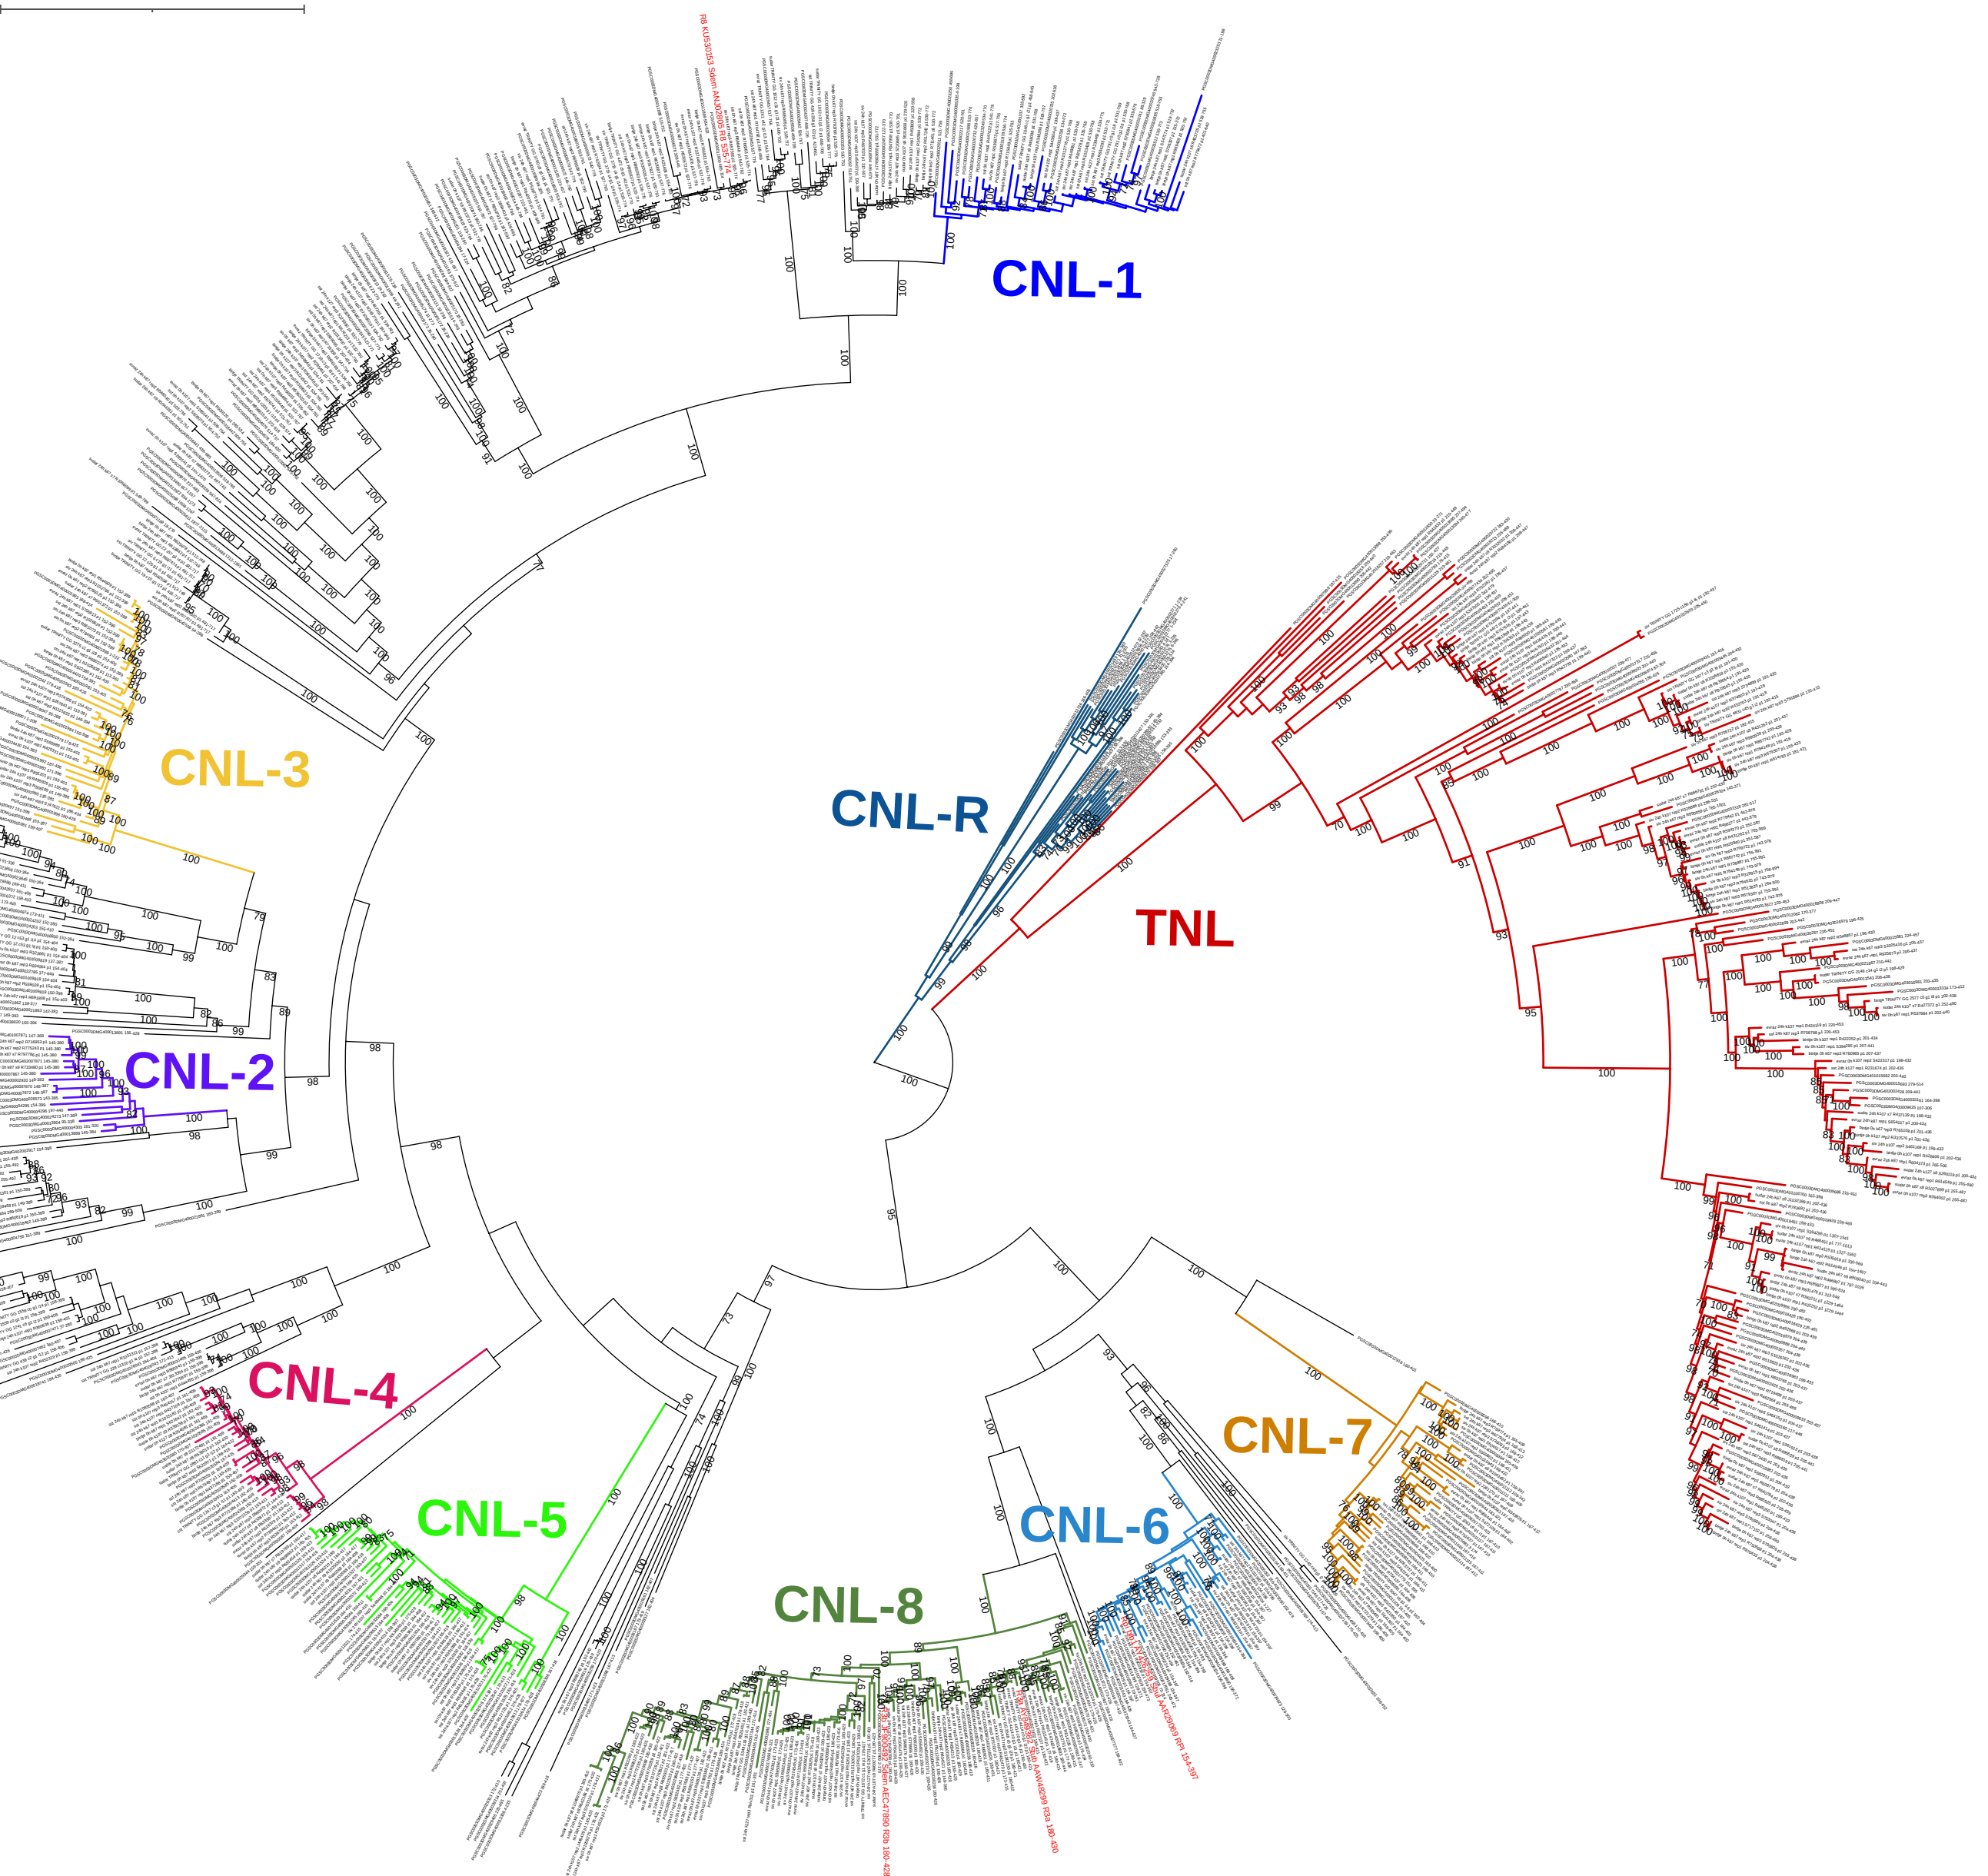

Supplement: s1 [file s1]

OG0043132

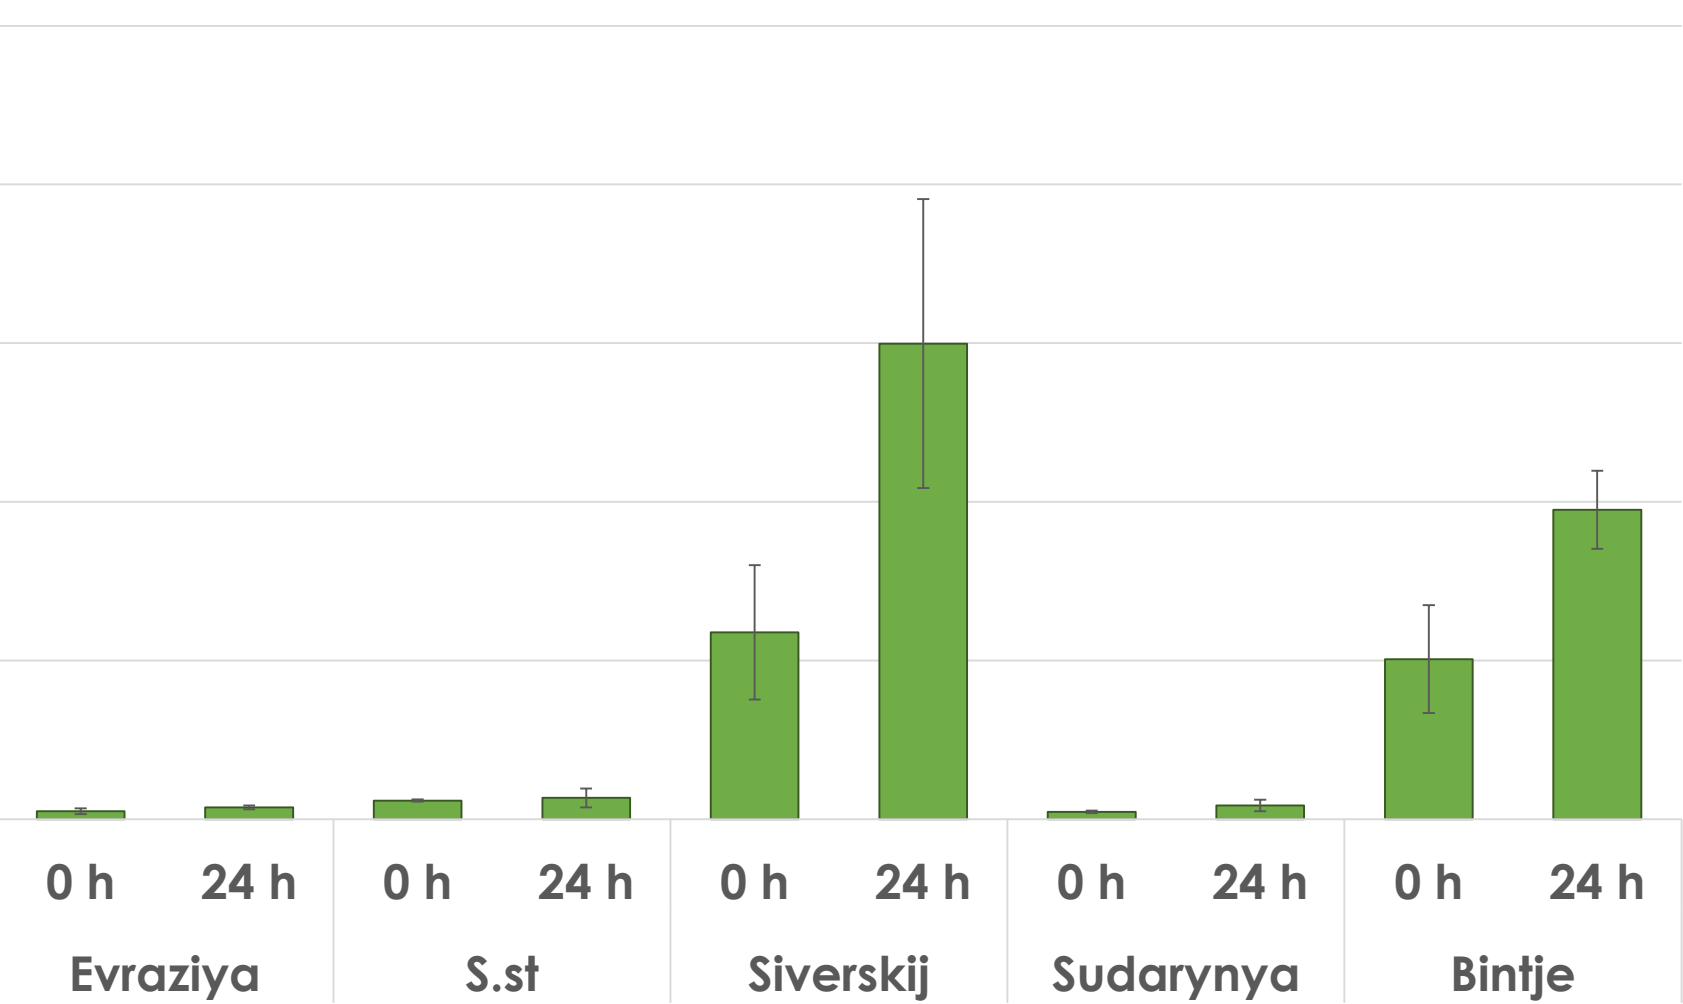

OG0042956

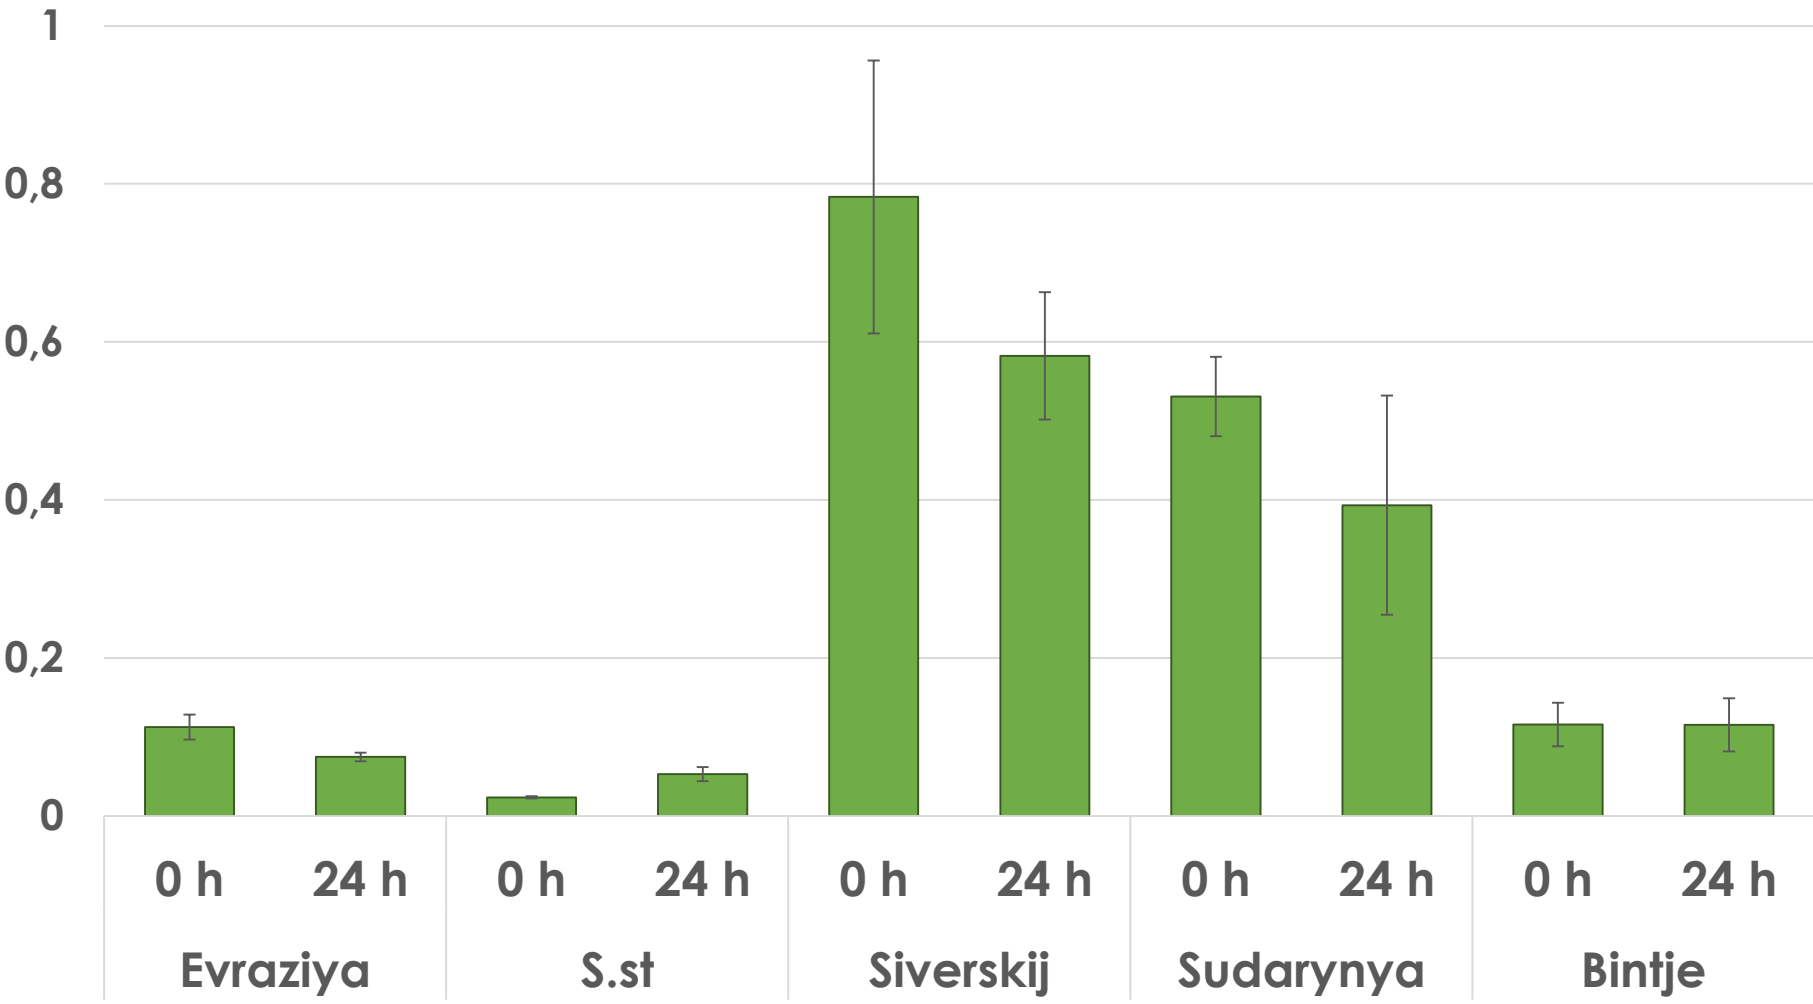

R228311

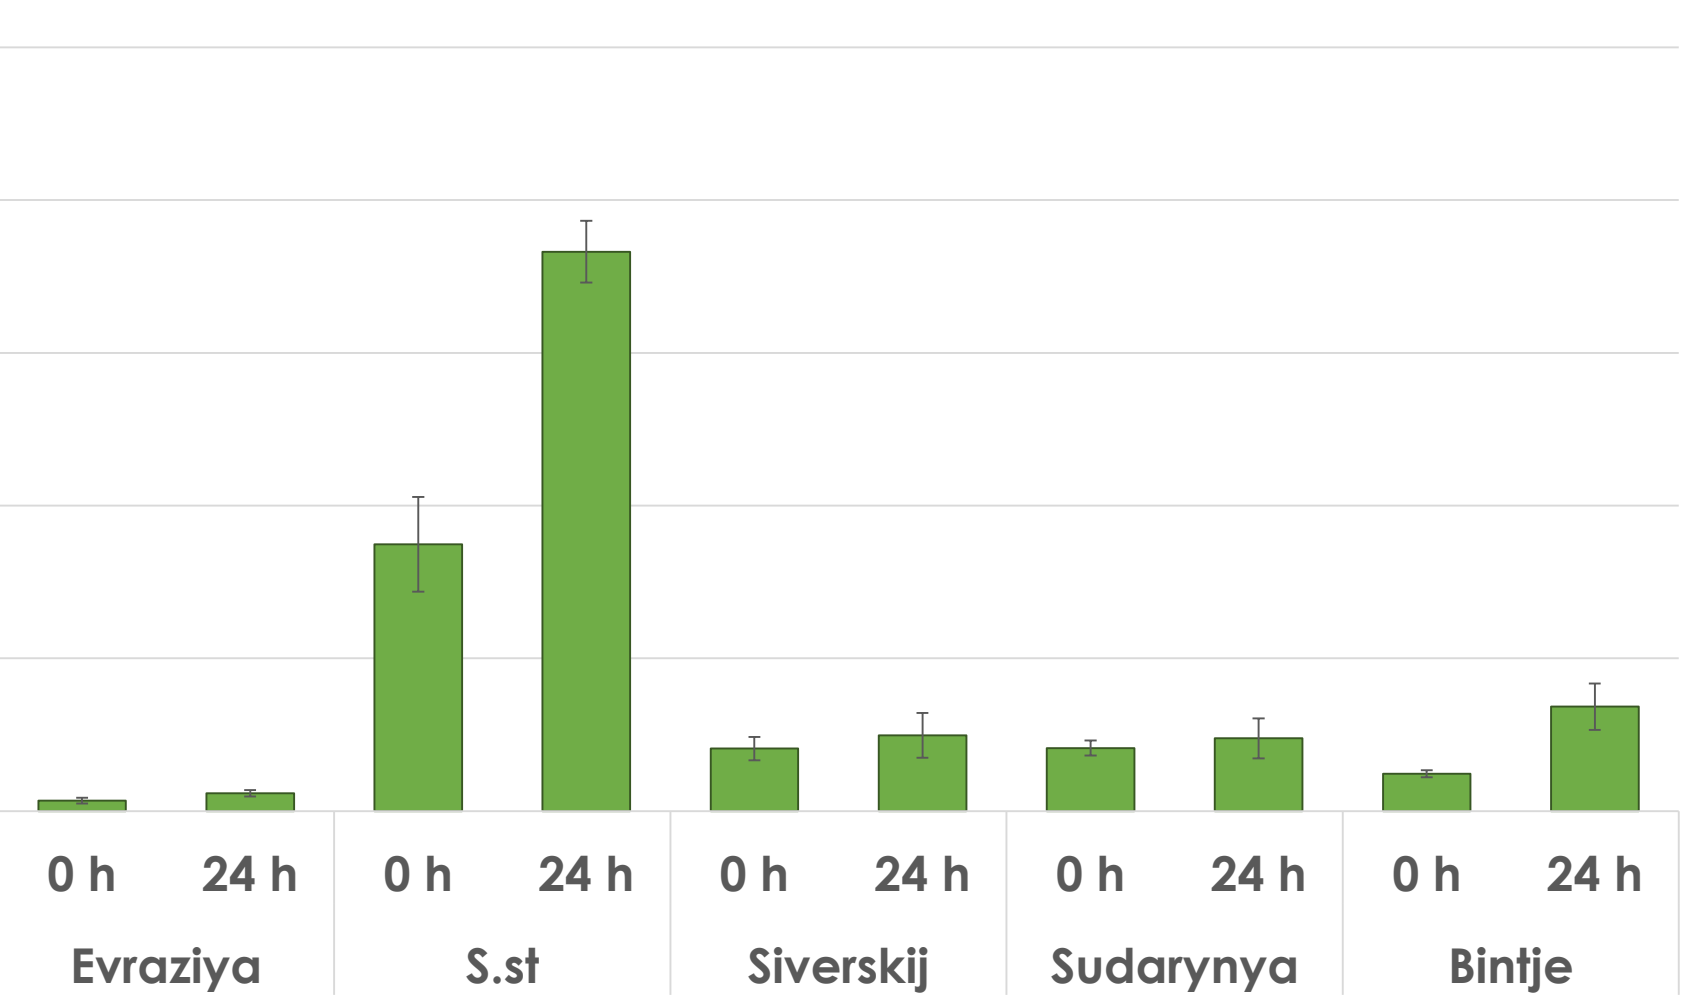

Supplement: s1 [file s1]
